# Supplementary material
Source: PubMed Central journal article supplement (PMC3283254)

DUAL BENEFICIAL EFFECT OF AN INTERLOOP DISULFIDE BOND FOR SINGLE DOMAIN  
ANTIBODY FRAGMENTS

**Jochen Govaert<sup>1,2,#</sup>, Mireille Pellis<sup>1,2,#</sup>, Nick Deschacht<sup>1,2</sup>, Cécile Vincke<sup>1,2</sup>, Katja Conrath<sup>1,2,\$</sup>, Serge  
Muyldermans<sup>1,2</sup> & Dirk Saerens<sup>1,2</sup>**

<sup>1</sup>Laboratory of Cellular and Molecular Immunology, Vrije Universiteit Brussel, Pleinlaan 2, B-1050  
Brussels, Belgium

<sup>2</sup>Department of Structural Biology, VIB, Brussels, Belgium

<sup>#</sup> These authors contributed equally to the work.

<sup>\$</sup> Present address: Galapagos NV, Generaal De Wittelaan L11 A3, B-2800 Mechelen, Belgium

Running head: Dual Effect of Interloop Cystine

Address correspondence to: Prof. Dr. Serge Muyldermans, Laboratory of Cellular and Molecular Immunology, VIB Department of Molecular and Cellular Interactions, Vrije Universiteit Brussel, Pleinlaan 2, B-1050 Brussels, Belgium. Tel.: +32-2-629.19.69; Fax: +32-2-629.19.81; E-mail: [svmuyld@vub.ac.be](mailto:svmuyld@vub.ac.be)

## Supplemental Figure

**Figure S1.** Fraction of unfolded VHH as a function of temperature (A-D) or GdmCl concentration (E,F). Properly folded VHH at 35°C or in a physiological buffer is unfolded by gradually increasing the temperature or the GdmCl concentration, respectively. The unfolding is followed spectrophotometrically. The open symbols (○,□) are for the native VHH, the black, filled symbols are for the cystine variants. The heat induced denaturation profiles in panel A is for cAbPSA-N7, panel B is cAbLys3, panel C is BM\_GFP2 and panel D is for BM\_GFP3. The chemical denaturation profiles of cAbPSA-N7 and cAbLys3 are given in panels E and F, respectively.

SUPPLEMENTARY FIGURE

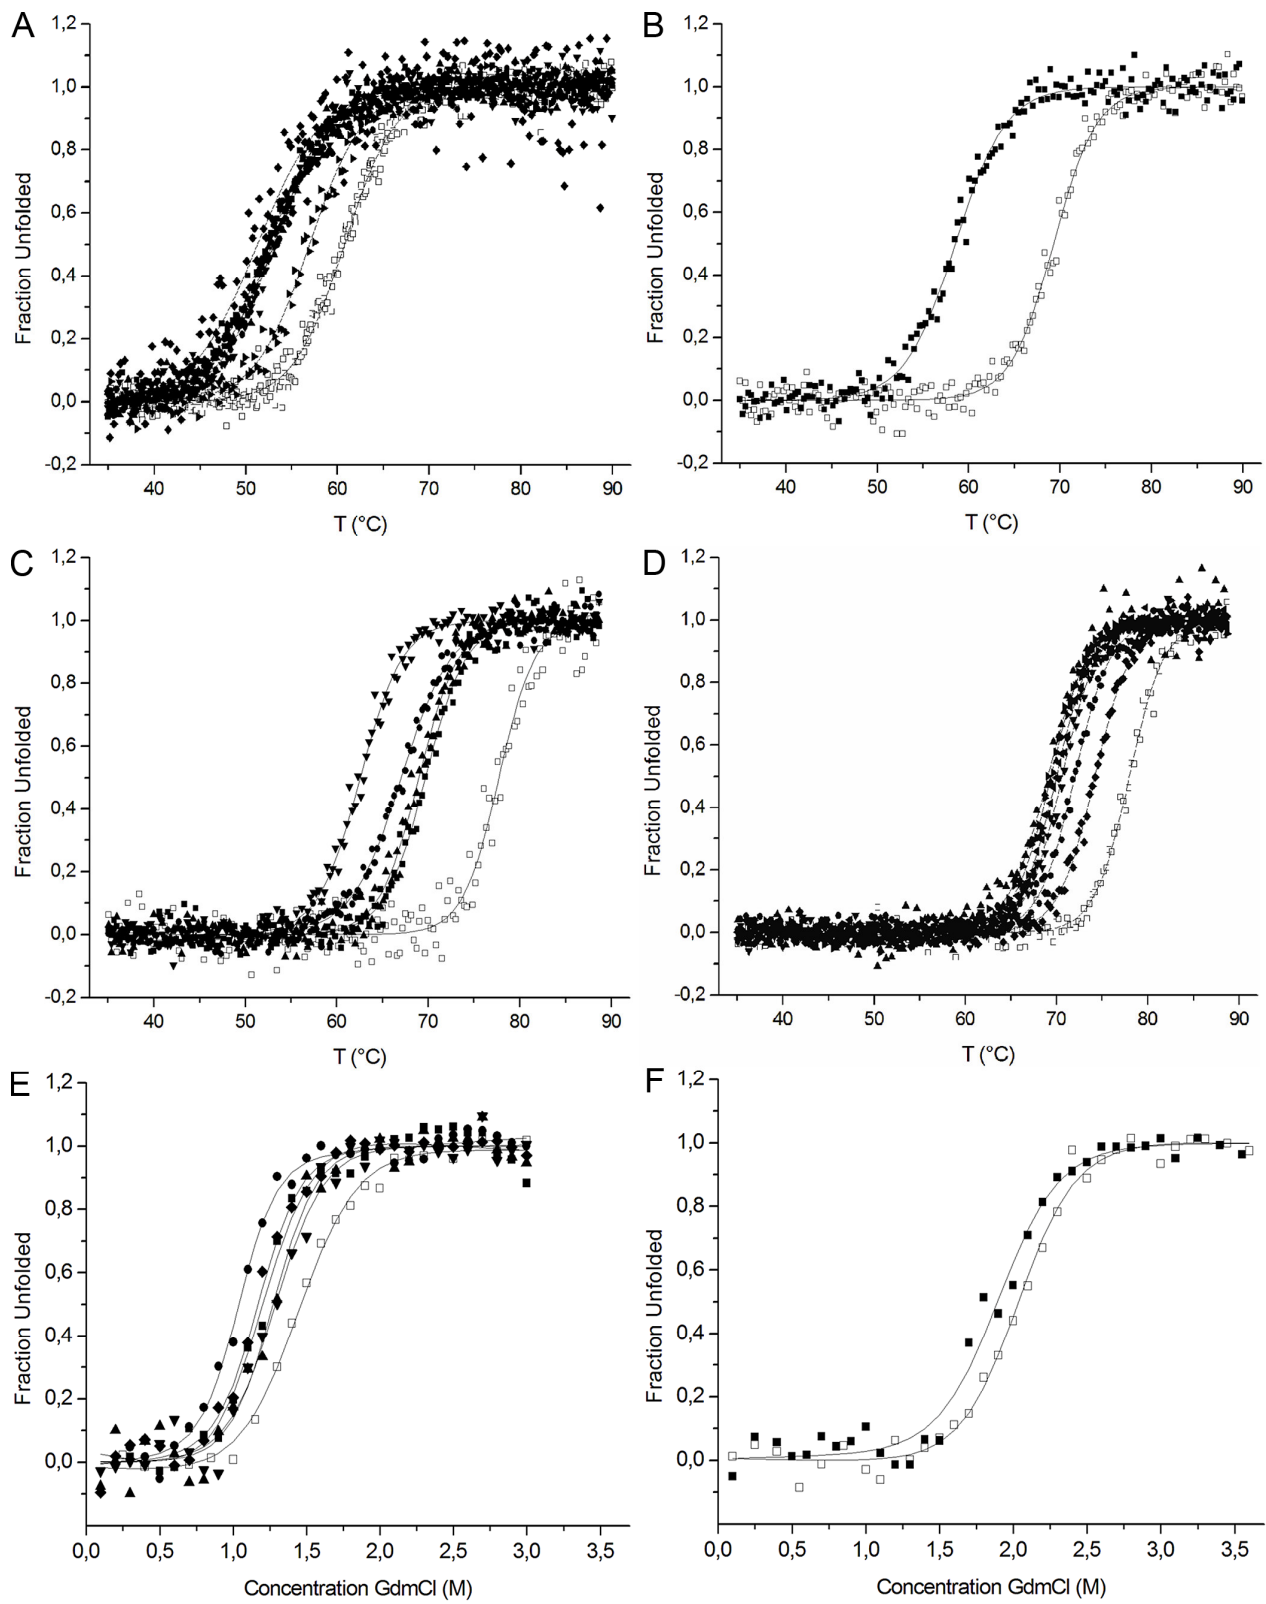

Supplement: supp_M111.242818_jbc.M111.242818-1.pdf [file supp_M111.242818_jbc.M111.242818-1.pdf]
